# An exact method for quantifying the reliability of end-of-epidemic declarations in real time

Kris V Parag<sup>1,†</sup>, Christl A Donnelly<sup>1,2</sup>, Rahul Jha<sup>3</sup>, and Robin N Thompson<sup>4</sup>

<sup>†</sup>Email: [k.parag@imperial.ac.uk](mailto:k.parag@imperial.ac.uk)

<sup>1</sup>MRC Centre for Global Infectious Disease Analysis, Imperial College London, London, W2 1PG, UK

<sup>2</sup>Department of Statistics, University of Oxford, Oxford, OX1 3LB, UK

<sup>3</sup>Department of Applied Math and Theoretical Physics, University of Cambridge, Cambridge CB3 0WA, UK

<sup>4</sup>Mathematical Institute, University of Oxford, Oxford, OX2 6GG, UK

## Abstract

We derive and validate a novel and analytic method for estimating the probability that an epidemic has been eliminated (i.e. that no future local cases will emerge) in real time. When this probability crosses 0.95 an outbreak can be declared over with 95% confidence. Our method is easy to compute, only requires knowledge of the incidence curve and the serial interval distribution, and evaluates the statistical lifetime of the outbreak of interest. Using this approach, we rigorously show how the time-varying under-reporting of infected cases will artificially inflate the inferred probability of elimination, leading to premature (false-positive) end-of-epidemic declarations. Contrastingly, we prove that incorrectly identifying imported cases as local will deceptively decrease this probability, resulting in delayed (false-negative) declarations. Failing to sustain intensive surveillance during the later phases of an epidemic can therefore substantially mislead policymakers on when it is safe to remove travel bans or relax quarantine and social distancing advisories. World Health Organisation guidelines recommend fixed (though disease-specific) waiting times for end-of-epidemic declarations that cannot accommodate these variations. Consequently, there is an unequivocal need for more active and specialised metrics for reliably identifying the conclusion of an epidemic.

**Author Summary:** Deciding on when to declare an infectious disease epidemic over is an important and non-trivial problem. Early declarations can mean that interventions such as lockdowns, social distancing advisories and travel bans are relaxed prematurely, elevating the risk of additional waves of the disease. Late declarations can unnecessarily delay the re-opening of key economic sectors, for example trade, tourism and agriculture, potentially

resulting in significant financial and livelihood losses. Here we develop and test a novel and exact data-driven method for optimising the timing of end-of-epidemic declarations. Our approach converts observations of infected cases up to any given time into a prediction of the likelihood that the epidemic is over at that time. Using this method, we quantify the reliability of end-of-epidemic declarations in real time, under ideal case surveillance, showing that it can depend strongly on past infection numbers. We then prove that failing to compensate for practical issues such as the time-varying under-reporting and importing of cases necessarily results in premature and delayed declarations, respectively. These variations and biases cannot be accommodated by current worldwide declaration guidelines. Sustained and intensive surveillance coupled with more adaptive declaration metrics are vital if informed end-of-epidemic declarations are to be made.

**Key-words:** epidemic elimination; renewal processes; reproduction numbers; epidemic curves; Bayesian statistics; infectious disease, second waves, epidemic extinction.

## INTRODUCTION

The timing of an end-of-epidemic declaration can have significant economic and public health consequences. Early or premature declarations can negate the benefits of prior control measures (e.g. quarantines or lockdown), leaving a population at an elevated risk to the resurgence of the infectious disease. The Ebola virus epidemic in Liberia (2014-2016), for example, featured several declarations that were followed by additional waves of infections [1]. Late or delayed declarations, however, can unnecessarily stifle commercial sectors such as agriculture, trade and tourism, leading to notable financial and livelihood losses. One of the first studies advocating the need for improved end-of-epidemic metrics suggested that the MERS-CoV epidemic in South Korea was declared over at least one week later than was necessary [2]. Balancing the health risk of a second wave of infections against the benefits of reopening the economy earlier is a non-trivial problem and is currently of major global concern as many countries prepare to meet the challenge of resurging COVID-19 caseloads.

World Health Organisation (WHO) guidelines adopt a time-triggered (i.e. decisions are enacted after some fixed, deterministic time) approach to end-of-epidemic declarations, recommending that officials wait for some prescribed period after the last observed infected case has recovered, before adjudging the outbreak over. The most common waiting time, which applies to Ebola virus and MERS-CoV among others, involves twice the maximum incubation period of the disease [3]. While having a fixed decision time is simple and actionable, it neglects the stochastic variation that is inherently possible at the tail of an outbreak. Recent studies have started to question this time-triggered heuristic and to investigate the factors that could limit its practical reliability.

Initial advances in this direction were made in [2], where mathematical formulae for assessing the end of an epidemic, in a data-driven manner, were derived. These formulae use the time-series of new cases (incidence) across

21 an epidemic together with estimates of its serial interval distribution and basic reproduction number to compute the  
22 probability that the outbreak is over at any moment. The serial interval distribution describes the random inter-event  
23 times between the onset of symptoms of an infector and infectee, while the basic reproduction number is the average  
24 number of secondary infections per primary infection at the start of an epidemic [4, 5]. The output of this method  
25 is an epidemiologically informed statistical measure of confidence in an end-of-epidemic declaration.

26 This approach is important, but not perfect. It assumes that infected cases are reported without any error and  
27 it depends on parameters that relate to the initial growth phase of the epidemic. Moreover, to maintain simplicity,  
28 it adopts a mathematically conservative description of transmission, making its end-of-epidemic declaration time  
29 estimates likely to be late or delayed [2]. More recent studies [6, 7] have applied forward simulation to investigate  
30 the tail dynamics of an outbreak. These have revealed the impact of the constant under-reporting of cases [6] and  
31 demonstrated the sensitivity of declarations to the effective reproduction number [7], a parameter that generalises  
32 the basic reproduction number and that remains relevant across all phases of the epidemic. The influence of different  
33 routes of transmission on declarations has also been examined in [1] using the framework of [2].

34 However, there is still much we do not know about the dynamics of an outbreak as it approaches its end.  
35 Specifically, analytic and general insight into the sensitivity of end-of-epidemic declarations to practical surveillance  
36 imperfections is needed. Real incidence data is corrupted by time-varying trends in under-reporting, delays in case  
37 notification and influenced by the interaction of imported and local cases [8, 9, 10]. Previous works have either  
38 assumed perfect reporting [2] or treated constant under-reporting within some simulated scenarios [6, 7]. Here  
39 we attempt to expose the implications of more realistic types of data corruption, particularly time-varying case  
40 under-reporting and importation, by developing an exact framework that provides broad and provable insights.  
41 Understanding how realistic surveillance patterns can bias our perception of the epidemic end is the first step to  
42 engineering sensible and effective countermeasures against these biases.

43 We build on the renewal process transmission model from [11, 12], to derive and test a novel and exact real-time  
44 method for estimating the probability of elimination; defined as the probability that no future local cases will emerge  
45 conditioned on the past epidemic incidence. We explain this model in Fig. 1. Using this probability, we define an  
46 event-triggered [13, 14] declaration metric that guarantees confidence in that declaration provided the assumptions  
47 of the model hold. The trigger is the first time that this probability crosses a threshold e.g. we are 95% confident  
48 in our declaration if the threshold is 0.95. Event-triggered decision-making was essentially proposed by [2], has  
49 proven effective in other fields [15, 16, 17] and belies the time-triggered WHO approach, which fixes the time  
50 (elapsed since the last case<sup>1</sup>) but not the confidence in declaration.

51 We benchmark our estimate against the true probability of elimination, i.e. the probability if the statistics and

<sup>1</sup>Strictly, it is the time elapsed since the last case has recovered or died. However, as this additionally delay is not informative, it does not invalidate or alter any of the results or statements in this paper and so we speak in terms of the last case time for simplicity.

52 effective reproduction number of the epidemic were known precisely, and show consistency under the perfect  
53 conditions in [2] but with the caveat that we estimate effective reproduction numbers from the incidence curve in  
54 real time. We find that even the true elimination probabilities strongly depend on the specific stochastic incidence  
55 curve observed, confirming that time-triggered decision heuristics are unwarranted. Using our exact framework we  
56 prove two key results about imperfect surveillance. First, any type of time-varying under-reporting will lead to  
57 premature or false-positive event-triggers and hence declarations, unless explicit knowledge of the under-reporting  
58 scheme is available. Second, a failure to identify and account for the differences between local and imported cases  
59 will result in delayed or false-negative event-triggers, regardless of the dynamics of case importation.

60 Many infectious disease epidemics, including the ongoing COVID-19 pandemic, are known to feature extensive  
61 time-varying under-reporting and repeated importations from different regions [18, 19]. As this pandemic progresses  
62 into a potential second wave in several countries, public health authorities will need to decide when to relax and  
63 reapply intervention measures such as lockdowns, social distancing policies or travel bans [20]. Our work suggests  
64 that intensive surveillance, both of cases and their origin, must be sustained to make informed, reliable and adaptive  
65 decisions about the threat posed by the virus in the waning stages of the outbreak, even if reported case numbers  
66 remain at zero for consecutive days. We hope that our method, which is available at [https://github.com/kpzoo/](https://github.com/kpzoo/End-of-epidemic-declarations)  
67 End-of-epidemic-declarations, will aid understanding and assessment of the tail kinetics of infectious epidemics.

## 68 I. METHODS

### 69 *Infectious disease transmission models*

70 We can mathematically describe the transmission of an infection within a population over time with a renewal  
71 process based on the Euler-Lotka equation from ecology and demography [4]. This process models communicable  
72 pathogen spread from a primary (infected) case to secondary ones at some time  $s$  using two key variables: the  
73 effective reproduction number,  $R_s$ , and the generation time distribution with probabilities  $\{w_u\}$  for all times  $u$ .  
74 Here  $R_s$  defines the number of secondary cases at time  $s + 1$  one primary case at  $s$  infects on average, while  $w_u$  is  
75 the probability that it takes  $u$  time units for a primary case to infect a secondary one [4]. As infection events are  
76 generally unobserved, we approximate the time of primary and secondary infection with the corresponding times  
77 of symptom onset i.e. the serial interval. This amounts to making the common assumption that the serial interval  
78 distribution, which can be observed, is a good approximation to the generation time distribution [2, 12].

79 If  $I_s$  counts the newly observed infected cases at  $s$  and a Poisson (Poisson) model is used to represent the noise  
80 in these observations then the renewal model captures the reproductive dynamics of infectious disease transmission  
81 with  $I_s \sim \text{Poisson}(R_{s-1}\Lambda_s)$  [5]. Here  $\Lambda_s := \sum_{u=1}^{s-1} I_{s-u}w_u$  is the total infectiousness of the disease up to time  $s - 1$   
82 and summarises how previous cases contribute to upcoming cases on day  $s$ . We use  $I_1^s := \{I_1, I_2, \dots, I_s\}$  to

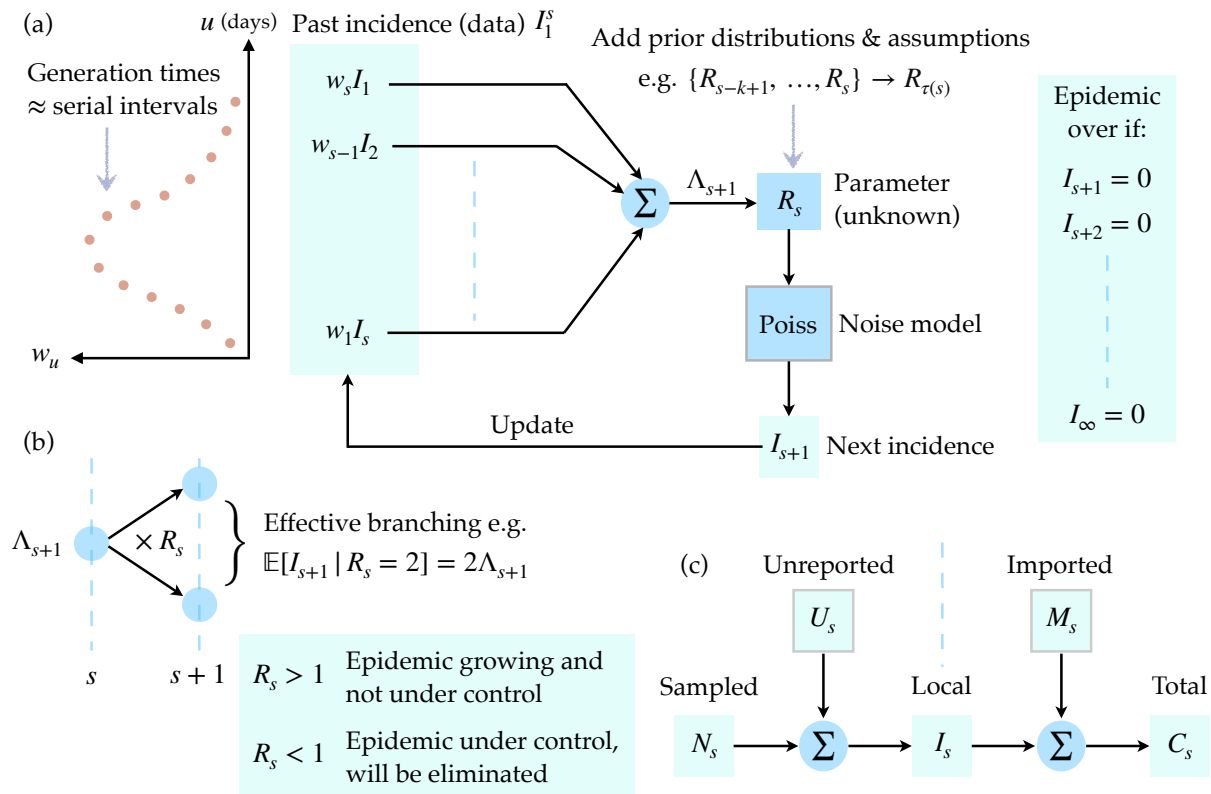

**Fig. 1: Transmission dynamics of an infectious disease.** The renewal approach to infection propagation is outlined under a Poisson noise model in panel (a). Past, observed infected cases  $I_1^s$ , which form an incidence curve, seed new infections with probabilities proportional to  $w_u$  defined by the generation time distribution of the disease, which is approximated by the serial interval distribution. The total infectiousness  $\Lambda_{s+1}$  sums the contributions of past cases according to the set of  $\{w_u\}$ . The effective reproduction number  $R_s$  determines how many effective infections are passed on to the next time unit  $s + 1$ . It is common to group  $R_s$  values over a window  $\tau(s)$  to improve estimation reliability. When all future incidence values are zero we conclude that the epidemic is over or eliminated. Panel (b) shows how  $R_s$  acts as a reproductive parameter, controlling whether the epidemic grows or dies out. This parameter is therefore essential to predicting the dynamics of an epidemic. Panel (c) provides a breakdown of more realistic observation assumptions, where we might not be able to directly measure the local and complete incidence  $I_s$  due to unreported  $U_s$  or imported (migrating)  $M_s$  cases. If we can only observe sampled cases,  $N_s$ , or the total number of cases,  $C_s$ , then our epidemic predictions will be biased.

83 represent the incidence curve from time 1 to  $s$ . A schematic of this approach to epidemic transmission is given  
 84 in Fig. 1. Usually we are interested in estimating the  $R_s$  numbers in real time [21, 22] from the progressing  $I_1^s$ ,  
 85 assuming that the serial interval distribution is known (i.e. derived from some other linelist data) [12].

86 This effective reproduction number is important for forecasting the kinetics of the epidemic. If  $R_s > 1$  then we  
 87 can expect the number of infections to increase monotonically with time. However, if  $R_s < 1$  is sustained then we  
 88 can be confident that the epidemic is being controlled and will, eventually, be eliminated [23]. In order to enhance  
 89 the reliability of these estimates we usually assume that the epidemic transmission properties are stable over a look-  
 90 back window of size  $k$  defined at time  $s$  as  $\tau(s) := \{s, s-1, \dots, s-k+1\}$  [12, 24]. We let the reproduction number  
 91 over this window be  $R_{\tau(s)}$  and apply a conjugate gamma (Gam) prior distribution assumption:  $R_{\tau(s)} \sim \text{Gam}(a, 1/c)$

92 with  $a$  and  $c$  as shape-scale hyperparameters. This formulation, together with the use of gamma prior distributions,  
93 is standard in current renewal model frameworks [12, 21, 25].

94 The posterior distribution of  $R_{\tau(s)}$  given the relevant window of the past incidence curve of data i.e.  $I_{\tau(s)} :=$   
95  $I_{s-k+1}^s$  is also gamma distributed as follows [22]

$$96 \quad R_{\tau(s)} | I_{\tau(s)} \sim \text{Gam} \left( a + i_{\tau(s)}, \frac{1}{c + \lambda_{\tau(s)}} \right), \quad (1)$$

98 with grouped sums  $i_{\tau(s)} := \sum_{u \in \tau(s)} I_u$  and  $\lambda_{\tau(s)} := \sum_{u \in \tau(s)} \Lambda_u$ . If some variable  $y \sim \text{Gam}(\alpha, \beta)$  then  $\mathbb{P}(y) =$   
99  $y^{\alpha-1} e^{-y/\beta} / \beta^\alpha \Gamma(\alpha)$  and  $\mathbb{E}[y] = \alpha\beta$ . As a result, Eq. (1) yields the posterior mean estimate of  $\hat{R}_{\tau(s)} = \alpha_{\tau(s)}\beta_{\tau(s)}$  with  
100  $\alpha_{\tau(s)} := a + i_{\tau(s)}$ ,  $\beta_{\tau(s)} := 1/c + \lambda_{\tau(s)}$ . Eq. (1) allows us to infer the grouped or averaged effective reproduction  
101 number over the window  $\tau(s)$ , which is considered an approximation of the unknown  $R_s$ .

102 We can derive the posterior predictive distribution of the next incidence value (at time  $s + 1$ ) by marginalising  
103 over the domain of  $R_{\tau(s)}$  as in [22]. If the space of possible predictions at  $s + 1$  is  $x | I_{\tau(s)}$  and NB indicates a  
104 negative binomial distribution then we obtain

$$105 \quad x | I_{\tau(s)} \sim \text{NB} \left( \alpha_{\tau(s)}, p_{\tau(s)} := \frac{\Lambda_{s+1}\beta_{\tau(s)}}{1 + \Lambda_{s+1}\beta_{\tau(s)}} \right). \quad (2)$$

107 Eq. (2) completely describes the uncertainty surrounding one-step-ahead incidence predictions and is causal because  
108 all of its terms (including  $\Lambda_{s+1}$ ) only depend on the past observed incidence curve  $I_1^s$  [22].

109 If a random variable  $y \sim \text{NB}(\alpha, p)$  then  $\mathbb{P}(y) := \binom{\alpha+y-1}{y} (1-p)^\alpha p^y$  and  $\mathbb{E}[y] = p\alpha/(1-p)$ . Hence our posterior  
110 mean prediction is  $\hat{I}_{s+1} = \mathbb{E}[x | I_{\tau(s)}] = \Lambda_{s+1}\hat{R}_{\tau(s)}$ . The current estimate of  $R_{\tau(s)}$  influences our ability to predict  
111 upcoming incidence points. Thus, we expect that good estimation of the effective reproduction number is necessary  
112 for projecting the future behaviour of an infectious disease epidemic. In Results we rigorously extend and apply  
113 this insight to derive an exact method for computing the probability that an epidemic is reliably over at some time  
114  $s$  i.e. that no future infections will occur from  $s + 1$  onwards.

### 115 *Under-reported and imported cases*

116 The above formulation assumes perfect case reporting and that all cases,  $I_1^s$ , are local to the region being  
117 monitored. We now relax these assumptions. First, we consider more realistic scenarios where only some fraction  
118 of the local cases are reported or observed at any time. We use  $N_s$  and  $U_s$  for the number of sampled and  
119 unreported cases at time  $s$ . We consider a general time-varying binomial (Bin) sampling model with  $0 \leq \rho_s \leq 1$   
120 as the probability that a true case is sampled at time  $s$  (hence  $1 - \rho_s$  is the under-reporting probability). Then  
121  $N_s \sim \text{Bin}(I_s, \rho_s)$ . The smaller  $\rho_s$  is, the less representative the sampled curve  $N_1^s$  is of the true  $I_1^s$ .

122 This is a standard model for under-reporting [8, 26] and implies the following statistical relationship

$$123 \quad I_s = N_s + U_s, \quad N_s \sim \text{Poiss}(\rho_s R_{s-1} \Lambda_s). \quad (3)$$

124

125 Raikov's theorem [27] states that if the sum of two independent variables is Poisson then each variable is also  
126 Poisson. Consequently,  $U_s$  is Poisson with mean  $(1 - \rho_s)R_{s-1}\Lambda_s$ . Most studies assume that  $\rho_s = \rho$  for all  $s$  i.e. that  
127 constant under-reporting occurs. The persistence of the Poisson relationship in Eq. (3) means that we can directly  
128 apply the forecasting and estimation results of the previous section to  $N_s$ . Practically, if we observe only  $N_1^s$  then  
129 unless we have independent knowledge of  $\rho_s$  (which can often be difficult to ascertain reliably [18, 26]) we can  
130 only construct an approximation to  $\rho_s \Lambda_s$  as  $\tilde{\Lambda}_s := \sum_{u=1}^{s-1} w_u N_{s-u}$  with  $\mathbb{E}[\tilde{\Lambda}(s)] = \rho_s \Lambda_s$ .

131 Second, we investigate when imported or migrating cases from other regions, denoted by count  $M_s$  at time  $s$ ,  
132 are introduced, resulting in the total number of observed cases being  $C_s$ . Within this framework we ignore the  
133 under-reporting of cases and assume that  $I_s$  is observed to avoid confounding factors. We follow the approach of  
134 [9] and describe  $M_s$  as a Poisson number with some mean at time  $s$  of  $\epsilon_s$ . Using Raikov's theorem we obtain

$$135 \quad C_s = I_s + M_s, \quad C_s \sim \text{Poiss}(R_{s-1} \Lambda_s + \epsilon_s). \quad (4)$$

136

137 Eq. (4) models how imported cases combine with existing local ones to propagate future local infections.

138 While our work does not require assumptions on  $\epsilon_s$ , for ease of comparison later on we adopt the convention  
139 that the sum of imports and local cases drive the epidemic forward with the same reproduction number and serial  
140 interval [28]. Consequently,  $I_s \sim \text{Poiss}(R_{s-1} \bar{\Lambda}_s)$  with  $\bar{\Lambda}_s := \sum_{u=1}^{s-1} w_u C_{s-u}$ . Practically, when surveillance is poor  
141 (i.e. local and imported cases cannot be distinguished), it is common to assume that all observed cases are local  
142 and conform to the approximate model  $C_s \sim \text{Poiss}(R_{s-1} \bar{\Lambda}_s)$  [25]. The forecasting and estimation results of the  
143 previous section therefore also apply under these conditions.

144 In Results we examine the impact of imperfect (our null hypothesis  $\mathcal{H}_0$ ) and ideal (the alternative  $\mathcal{H}_1$ ) surveillance  
145 within the context of under-reporting and importation in turn. We treat each problem individually to isolate the  
146 impact of each bias. Ideal surveillance then represents the ability to know either  $U_s$  or  $M_s$  (depending on the problem  
147 of interest) and hence account for their contributions. Imperfect surveillance refers to only having knowledge of  $N_s$   
148 or  $C_s$  and basing inferences on these curves under the strong assumption that they approximate the true incidence.  
149 This assumption is often made in the literature [2, 12, 21] for the purposes of tractability and means Eq. (1) and  
150 Eq. (2) are valid. Fig. 1 summarises the relationships from Eq. (3) and Eq. (4).

## RESULTS

151

### 152 *An exact method for declaring an outbreak over*

153 We define an epidemic to be eliminated or over [23] at time  $s$  if no future, local or indigenous infected cases  
154 are observed i.e.  $I_{s+1} = I_{s+2} = \dots = I_{\infty} = 0$ . We can define the estimated probability of elimination,  $z_s$ , as

$$155 \quad z_s := \mathbb{P} \left( \bigwedge_{j=s}^{\infty} I_{j+1} = 0 \mid I_1^s \right), \quad (5)$$

156

157 with  $I_1^s$  as the incidence curve (data), observed until time  $s$ . We refer to  $z_s$  as an estimated probability because we  
158 do not have perfect knowledge of the epidemic statistics e.g. we cannot know  $R_s$  precisely. The importance of this  
159 distinction will become clear in the subsequent section (see Eq. (10)). However, we observe that if we could have  
160 this idealised knowledge then Eq. (5) would exactly define the probability of no future cases given  $I_1^s$ .

161 Declaring the end of an epidemic with confidence  $\mu\%$  translates into solving the optimal stopping time problem

$$162 \quad t_{\mu} = \arg \min_s z_s \geq \frac{\mu}{100}, \quad (6)$$

163

164 with  $t_{95}$ , for example, signifying the first time that we are at least 95% sure that the epidemic has ended. Note that  
165  $z_s$  is a function of  $I_1^s$  and practically characterises our uncertainty in the outcome of the epidemic (i.e. if it is over  
166 or not). This uncertainty derives from the fact that a range of possible epidemics with distinct future incidences  
167  $I_{s+1}^{\infty}$  can possess the same  $I_1^s$  and  $R_1^s$  values. Some uncertainty exists even if  $R_1^s$  is known perfectly.

168 Eq. (6) presents an event-triggered approach to declaring the end of an epidemic with the  $\mu$  threshold serving as  
169 an informative trigger. Event-triggered formulations have the advantage of being robust to changes in the observed  
170 data [13, 14], a point visible from the dependence of  $z_s$  and hence  $t_{\mu}$  on  $I_1^s$ . While Eq. (6) is written in absolute  
171 time, we may also clock time relative to the last observed case,  $t_0$ . Our waiting time until declaration is then  
172  $\Delta t_{\mu} = t_{\mu} - t_0$ , which is more useful for comparing  $z_s$  values from various realisations of  $I_1^s$  and for deriving  
173 confidence intervals. Later, we consider differences in the  $\Delta t_{\mu}$ , denoted  $\delta t_{\mu}$ , proposed by comparable methods.

174 Previous works on end-of-epidemic declarations have either approximated  $z_s$  with a simpler, more conservative  
175 probability [2] or used simulations to estimate a quantity similar to  $z_s$  that is averaged over those simulations [6]  
176 [7]. No study has yet (to our knowledge) included real-time estimates of  $R_s$ , within its assessment of epidemic  
177 elimination, despite the importance of this parameter in foretelling transmission [23]. By taking the renewal process  
178 approach to epidemic propagation (see Fig. 1), we explicitly embed uncertainty about  $R_s$  estimates to obtain an  
179 analytic and insightful expression for the probability that the outbreak is over given past observed cases (Eq. (5)).

180 We derive this by inferring  $R_s$  within a sequential Bayesian framework from  $I_1^s$ , using a moving window of  
181 length  $k$  time units. We denote this estimate  $R_{\tau(s)}$  with window  $\tau(s)$  spanning  $I_{s-k+1}^s$  [12, 22]. Our main result is  
182 summarised as a theorem below (see Methods for further details and notation). Fig. 2 illustrates how our computed



183  $z_s$  probability varies across the lifetime of an example incidence curve, thus providing a real-time, causal and  
 184 dynamically updating view of our confidence in its end.

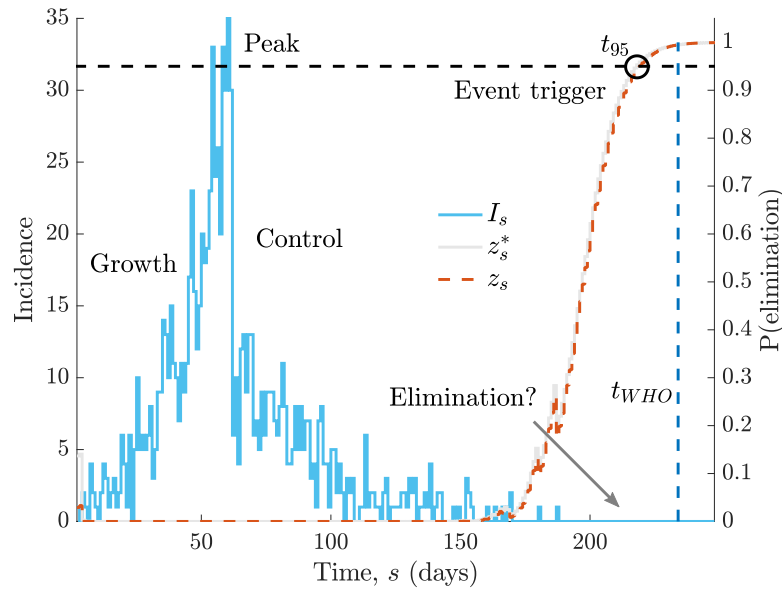

**Fig. 2: Elimination probabilities across the lifetime of an epidemic.** We simulate a single incidence curve,  $I_s$  (blue, case counts on left y-axis), under the serial interval distribution for Ebola virus [29] and a true  $R_s$  profile that step changes from 2 to 0.5 at  $s = 100$  days. We compute the true and estimated elimination probabilities,  $z_s^*$  and  $z_s$ , conditional on all cases observed up to time  $s$  in grey and red respectively (right y-axis). The circle (black) indicates when the outbreak can be declared over with 95% confidence. Observe how  $z_s$  and  $z_s^*$  respond to the low  $I_s$  at the beginning of the epidemic before remaining 0 until we get to the tail of the outbreak, where a couple fluctuations occur due to some final cases. An estimate of the WHO declaration time,  $t_{WHO}$  [3], which is mostly insensitive to past case profiles is in dark blue. The central question in this study is how few cases need to be observed in the recent past before we can be confident that the epidemic has been eliminated.

185 **Theorem 1.** If the posterior distribution of the grouped effective reproduction number,  $R_{\tau(s)}$ , given the incidence  
 186 curve  $I_1^s$  has form  $\text{Gam}(\alpha_{\tau(s)}, \beta_{\tau(s)})$  then the estimated probability that this epidemic has been eliminated at time  
 187  $s$  is  $z_s = \prod_{j=s}^{\infty} \left(1 + \frac{\hat{I}_{j+1}}{\alpha_{\tau(j)}}\right)^{-\alpha_{\tau(j)}}$  with  $\hat{I}_{j+1} = \Lambda_{j+1} \hat{R}_{\tau(j)}$  and  $\hat{R}_{\tau(j)} = \alpha_{\tau(j)} \beta_{\tau(j)}$  as the mean posterior incidence  
 188 prediction and effective reproduction number estimate at time  $j$ , respectively.

189 We outline the development of this theorem. First, we decompose Eq. (5) into sequentially predictive terms as:

$$190 \quad z_s = \mathbb{P}(I_{s+1} = 0 | I_1^s) \prod_{j=s+1}^{\infty} \mathbb{P}(I_{j+1} = 0 | I_1^j). \quad (7)$$

192 For simplicity, we rewrite Eq. (7) as  $z_s = q_0 \prod_{j=1}^{\infty} q_j$ . The factor  $q_j$  conditions on  $I_1^{s+j}$ , which includes all the  
 193 epidemic data,  $I_1^s$  and the sequence of assumed zeros beyond that i.e.  $I_{s+1}^{s+j} = 0$  for  $j \geq 1$ . This sequence is treated  
 194 as pseudo-data. Observe that  $q_0$  is simply a one-step-ahead prediction of 0 from the available incidence curve.

195 We solve Eq. (7) by making use of known renewal model results derived in [12, 22, 24] and outlined in Methods.  
 196 The renewal transmission model allows us to estimate the effective reproduction number  $R_s$  and hence compute

197  $z_s$  in real time (see Fig. 1). This estimate at time  $s$ ,  $R_{\tau(s)}$ , uses the look-back window  $\tau(s)$  of  $k$  time units (e.g.  
 198 days). The posterior over  $R_{\tau(s)}$  is shape-scale gamma distributed as  $\text{Gam}(\alpha_{\tau(s)}, \beta_{\tau(s)})$  with  $\alpha_{\tau(s)} := a + i_{\tau(s)}$   
 199 and  $\beta_{\tau(s)} := \frac{1}{c + \lambda_{\tau(s)}}$  (see Eq. (1)). Here  $(a, c)$  are hyperparameters of a gamma prior distribution placed on  $R_{\tau(s)}$   
 200 and  $i_{\tau(s)}$  and  $\lambda_{\tau(s)}$  are grouped sums of the incidence  $I_u$  and total infectiousness  $\Lambda_u$  for  $u \in \tau(s)$ . The total  
 201 infectiousness describes the cumulative impact of past cases and is defined in Methods.

202 Under this formulation, the posterior predictive distribution of the incidence at  $s + 1$  is negative binomially dis-  
 203 tributed (NB) (see Eq. (2)). The probability of  $I_{s+1}$  being zero from this distribution gives  $q_0 = (1 + \Lambda_{s+1}\beta_{\tau(s)})^{-\alpha_{\tau(s)}}$   
 204 by substitution. The next term,  $q_1$ , is computed similarly because we condition on  $I_{s+1} = 0$  as pseudo-data (i.e.  
 205 the sequential terms in Eq. (7)) and update  $\Lambda_{s+2}$ ,  $\beta_{\tau(s+1)}$  and  $\alpha_{\tau(s+1)}$  with this zero. Iterating for all terms yields

$$206 \quad z_s = \prod_{j=s}^{\infty} (1 + \Lambda_{j+1}\beta_{\tau(j)})^{-\alpha_{\tau(j)}}, \quad (8)$$

207

208 which is an exact expression for  $z_s$ . As a string of zero incidence values accumulates with time  $\Lambda_{j+1} \rightarrow 0$  and  
 209 hence  $q_j \rightarrow 1$ . Consequently, only a finite number of terms in Eq. (8) need to be computed and the initial ones are  
 210 the most important for evaluating  $z_s$ .

211 The posterior mean estimate of  $R_{\tau(s)}$  is  $\hat{R}_{\tau(s)} = \mathbb{E}[R_{\tau(s)} | I_1^s] = \mathbb{E}[R_{\tau(s)} | I_{\tau(s)}] = \alpha_{\tau(s)}\beta_{\tau(s)}$  with  $I_{\tau(s)}$  as the  
 212 incidence values in the  $\tau(s)$  window (the remaining  $I_1^{s-k}$  are assumed uninformative [12]). This follows from the  
 213 Gam distribution and implies a posterior mean incidence prediction  $\hat{I}_{s+1} = \mathbb{E}[I_{s+1} | I_{\tau(s)}] = \Lambda_{s+1}\hat{R}_{\tau(s)}$  from the  
 214 NB posterior predictive distribution [22]. Substituting these into Eq. (8) gives:

$$215 \quad z_s = \prod_{j=s}^{\infty} \left(1 + \frac{\hat{I}_{j+1} = \Lambda_{j+1}\hat{R}_{\tau(j)}}{\alpha_{\tau(j)}}\right)^{-\alpha_{\tau(j)}}. \quad (9)$$

216

217 This completes the derivation. Theorem 1, when combined with Eq. (6), provides a new, analytic and event-  
 218 triggered approach to adjudging when an outbreak has ended. Eq. (9) provides direct and quantifiable insight into  
 219 what controls the elimination of an epidemic and can be easily computed and updated in real time.

## 220 *Understanding the probability of elimination*

221 We dissect and verify the implications of Theorem 1, which provides an exact formula for estimating the  
 222 probability,  $z_s$ , that any infectious disease epidemic has been eliminated by time  $s$ . Eq. (8) formalises the expectation  
 223 that any decrease in case incidence increases  $z_s$ . This results because  $\partial q_j / \partial \alpha_{\tau(j)} > 0$  for all  $\alpha_{\tau(j)}$ , meaning that  $q_j$   
 224 is monotonically increasing in  $\alpha_{\tau(j)}$  and hence  $i_{\tau(j)}$ . As  $z_s$  is a product of  $q_j$  and every  $q_j$  is positive then  $z_s$  is  
 225 also monotonically increasing in all incidence window sums. Consequently, any process that reduces historical or  
 226 cumulative incidence surely increases the probability of elimination.

227 The main variable controlling  $z_s$  is the average predicted incidence  $\hat{I}_{j+1}$  (see Eq. (9)). Reducing either  $\Lambda_{j+1}$

228 or  $\hat{R}_{\tau(j)}$  therefore increases our confidence in a declaration made after a fixed time (the time-triggered approach)  
229 or, decreases the time of declaration for a fixed confidence (the event-triggered approach). This highlights the  
230 two known ways that sustained interventions, e.g. vaccination, social-distancing or quarantine, can help drive an  
231 epidemic to extinction. First, such measures explicitly limit  $R_j$  and hence  $\hat{R}_{\tau(j)}$ , leading to an expected rise in  $z_s$   
232 [23]. Second, they may also implicitly reduce the duration of the serial interval, resulting in smaller  $\Lambda_{j+1}$  [30].

233 Accordingly, under- or over-estimating  $\hat{R}_{\tau(j)}$  or using incorrectly smaller or larger  $\Lambda_{j+1}$  sums induces spurious  
234 fluctuations in  $z_s$  and promotes premature or delayed declarations, respectively. This insight underlies later analyses,  
235 which investigate how surveillance imperfections can modulate the declaration time. Because we cannot reduce either  
236 reproduction numbers or serial intervals to arbitrary values of interest (e.g. certain diseases have intrinsically wider  
237 serial interval distributions) some epidemics will be innately harder to control and eliminate [31].

238 Interestingly, while  $z_s$  is controlled by mean estimates and predictions, it appears insensitive to the uncertainty  
239 around those means, despite its derivation from the posterior distributions of Eq. (1) and Eq. (2). This follows from  
240 the inherent data shortage at the tail of an epidemic (there are necessarily many zero incidence points), which likely  
241 precludes the inference of higher order statistics [24]. Moreover, when the incidence is small stochastic fluctuations  
242 can dominate epidemic dynamics. Consequently, to maximise the reliability of our  $z_s$  estimates we recommend  
243 using long windows (large  $k$ ) for  $\hat{R}_{\tau(j)}$ . Short windows are more sensitive to recent fluctuations and are more prone  
244 to yielding uninformative estimates when many zero incidence points occur [22].

245 Last, we validate the correctness of our estimated  $z_s$  by considering a hypothetical setting in which the true  
246 reproduction number,  $\{R_s : s \geq 0\}$ , is known without error. This allows us to derive the true (but unknowable)  
247 probability of elimination  $z_s^*$  at time  $s$ , given complete information of the epidemic statistics. Under the renewal  
248 model  $\mathbb{P}(I_{s+1} = 0 | I_1^s) = e^{-R_s \Lambda_{s+1}}$ . Repeating this process sequentially for future zero infected cases (akin to  
249 describing the likelihood of that observation series) gives:

250  
251 
$$z_s^* = \prod_{j=s}^{\infty} e^{-\Lambda_{j+1} R_j} = e^{-\sum_{j=s}^{\infty} \Lambda_{j+1} R_j}. \quad (10)$$

252 Clearly  $z_s^*$  depends on the serial interval distribution and past incidence (through  $\Lambda_{j+1}$ ) and the sequence of  
253 reproduction numbers  $R_j$ , which are the main factors underlying the transmission of the infectious disease.

254 The true declaration time with confidence  $\mu\%$  is then  $t_\mu^* = \arg \min_s z_s^* \geq \frac{\mu}{100}$  (see Eq. (6)). We can verify  
255 our approach to end-of-epidemic declarations if we can prove that  $t_\mu$  sensibly converges to  $t_\mu^*$ . At the limit of  
256  $\alpha_{\tau(j)} \rightarrow i_{\tau(j)} \rightarrow \infty$ , the estimated  $\hat{R}_{\tau(j)}$  tends to the true  $R_j$  because under those conditions the posterior mean  
257 estimate coincides with the grouped maximum likelihood estimate of  $R_j$ , which is unbiased. Applying this limit to

258  $q_j$  in Eq. (9) we find that as  $\hat{R}_{\tau(j)} \rightarrow R_j$ :

259 
$$\lim_{i_{\tau(j)} \rightarrow \infty} \left( 1 + \frac{\Lambda_{j+1} \hat{R}_{\tau(j)}}{i_{\tau(j)}} \right)^{-i_{\tau(j)}} = e^{-\Lambda_{j+1} R_j}, \quad (11)$$

260

261 implying that  $z_s \rightarrow z_s^*$ , and consequently that  $t_\mu \rightarrow t_\mu^*$ .

262 This asymptotic consistency suggests that  $z_s$  and  $t_\mu$  indeed approximate the true but unknowable probability  
263 of elimination  $z_s^*$  and declaration time  $t_\mu^*$ . Other end-of-epidemic metrics in the literature have not shown such  
264 theoretical justification. We illustrate  $z_s$  and  $z_s^*$  across a simulated and representative incidence curve in Fig. 2.  
265 There we find a good correspondence between these probabilities and observe their sensitivity to changes in incidence  
266 at the beginning and end of this outbreak. Note that  $z_s$  and  $z_s^*$  (and hence  $t_\mu$  and  $t_\mu^*$ ) depend on  $I_1^s$  and are more  
267 precisely written as  $z_s | I_1^s$  and  $z_s^* | I_1^s$ . The WHO declaration time,  $t_{WHO}$ , which is included for reference, is mostly  
268 independent of the shape of  $I_1^s$  [3], explaining why it provides no confidence guarantee.

### 269 *Practical comparisons and verification*

270 We have only validated our approach at an asymptotic limit that is not realistic for elimination i.e. the proof that  
271  $z_s$  and  $t_\mu$  converge to their true counterparts requires infinite incidence. While this proof suggests our formulation  
272 is mathematically correct, it does not indicate its performance on actual elimination problems. We now verify our  
273 method more practically. We first use simulated data to show that  $\Delta t_\mu = t_\mu - t_0$  and  $\Delta t_\mu^* = t_\mu^* - t_0$  correspond  
274 well over several end-of-epidemic problems, where we are far from this limit, and with  $t_0$  as the time of the last  
275 observed case. We characterise this via histograms of the error  $\delta t_\mu = \Delta t_\mu - \Delta t_\mu^* = t_\mu - t_\mu^*$ , which are given in  
276 panels (a)-(c) of Fig. 3. There we present 95% ( $\mu = 0.95$ ) declaration time errors over 1000 simulated epidemics  
277 with serial interval distributions from the COVID-19 pandemic [32], MERS-CoV in Saudi Arabia [25], Marburg  
278 virus in Angola [29] and Measles in Germany [12].

279 We investigate true  $R_s$  profiles that describe (a) rapidly controlled, (b) partially recovering and (c) exponentially  
280 rising and falling transmission (boom-bust). For each profile we use the renewal model to simulate conditionally  
281 independent  $I_1^s$  curves and compute  $z_s | I_1^s$  and  $z_s^* | I_1^s$  using Eq. (9) and Eq. (10). The declaration time errors then  
282 follow as above and from Eq. (6). Panel (d) plots these  $R_s$  profiles (top) and the serial interval distributions for  
283 each disease (bottom). Generally, we find that  $t_\mu$  is a good approximation to  $t_\mu^*$ , with some error naturally emerging  
284 from the difficulty of estimating  $R_s$  in conditions where data are necessarily scarce [33]. Our prior distribution  
285 over  $R_{\tau(j)}$  is  $\text{Gam}(1, 5)$ , which is both uninformative and has a large mean of 5.

286 This error,  $\delta t_{95}$ , is more prominent for diseases featuring wide serial interval distributions, which are fundamen-  
287 tally more difficult to estimate, due to their dependence on much earlier epidemic dynamics. These simulations  
288 also demonstrate why time-triggered approaches can be misleading; they do not adapt to the shape of the specific

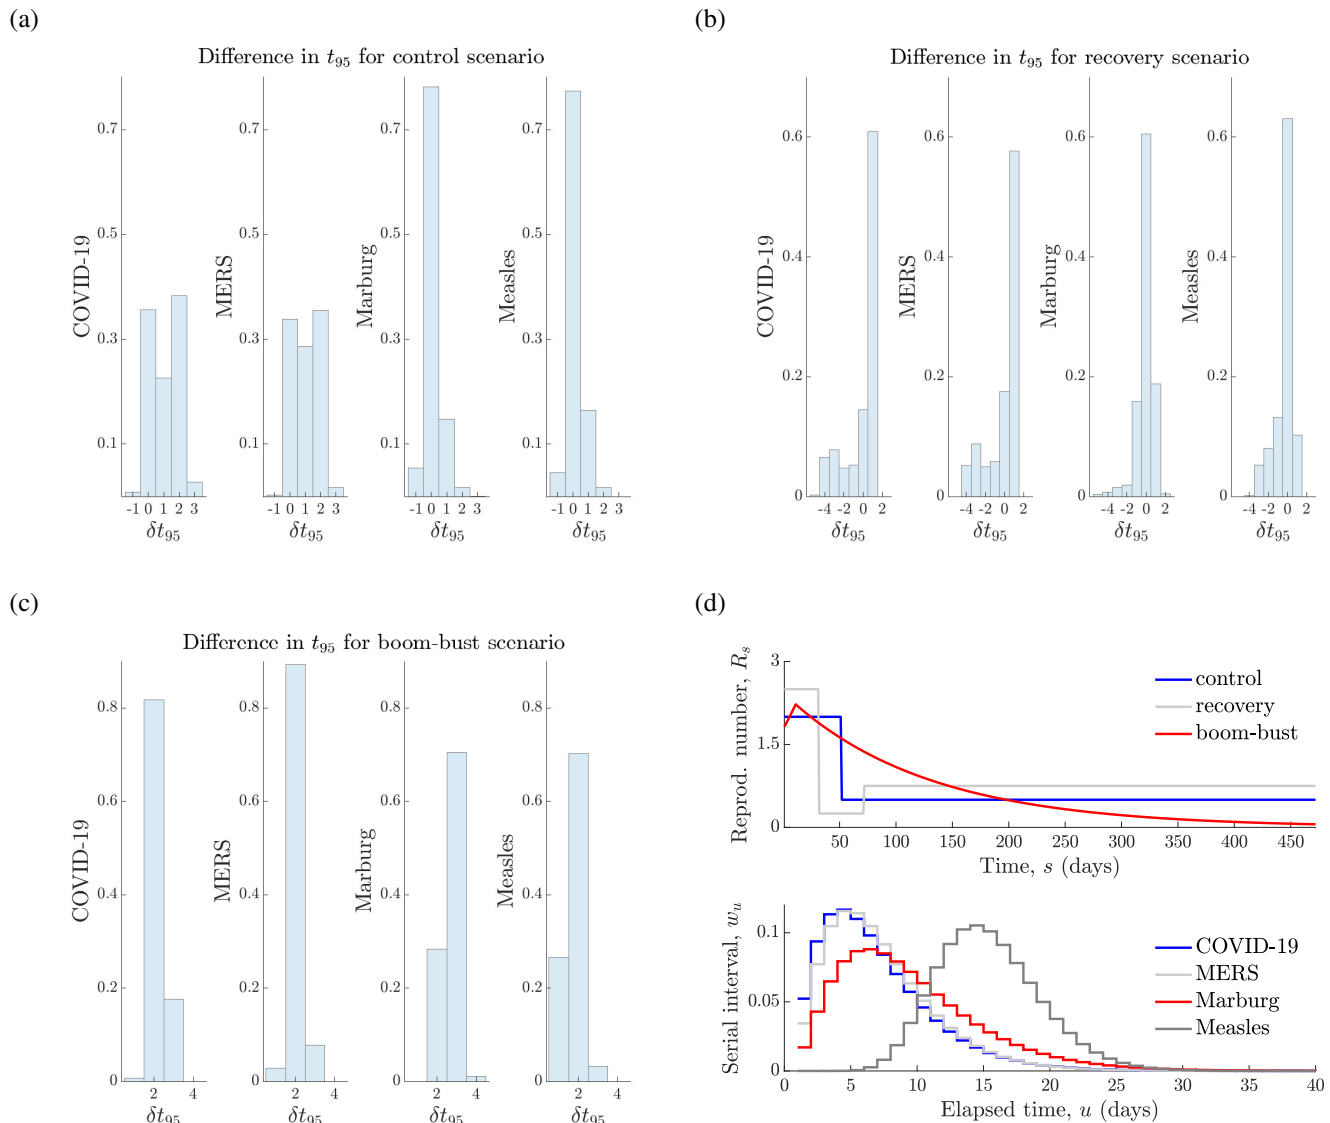

**Fig. 3: True and estimated declaration times.** We simulate 1000 independent incidence curves under various renewal models and provide normalised histograms of the difference between the estimated and true declaration times i.e.  $\delta t_{95} = \Delta t_{95} - \Delta t_{95}^* = t_{95} - t_{95}^*$ . Panels (a)-(c) present these histograms for various infectious diseases under  $R_s$  profiles indicating (a) rapidly controlled, (b) recovering and (c) rising and then decaying transmission (boom-bust). The top row of (d) plots the true  $R_s$  curves in absolute time, while the bottom row of (d) provides the serial interval distributions of the infectious diseases examined. Generally we find that  $t_{95} \approx t_{95}^*$  to a reasonable level. The quality of this approximation depends on the variability of the serial interval distribution (see S1 Fig) and the degree of fluctuation in transmission when incidence is small.

289 instance of  $I_1^s$  observed. An example of this is given in S1 Fig, where we find that the WHO declaration time  
290  $\Delta t_{WHO} = t_{WHO} - t_0$  is delayed relative to both the true ( $\Delta t_{95}^*$ ) and estimated  $\Delta t_{95}$  event-triggered declaration  
291 times, for Ebola virus disease, which has a wide serial interval. Depending on the disease of interest  $\Delta t_{WHO}$   
292 could also be premature. The large variability among the possible  $\Delta t_{95}^*$  provides a clear visualisation of the non-  
293 deterministic nature of epidemic end-points and the need for adaptive metrics with stated confidence.

294 At present, we have only verified our method under ideal reporting conditions. Practical surveillance is investigated  
295 in later sections. We now compare our method to the event-triggered one of [2], which assumes ideal surveillance  
296 and models epidemic transmission with a NB branching process that is strictly only valid at the beginning of the  
297 outbreak. This notably differs from our renewal model approach and the elimination probabilities derived in [2]  
298 are a mathematically conservative approximation to our  $z_s$ . We compare both methods on MERS-CoV data from  
299 South Korea, examined in [2], by running them on a set of bootstrapped incidence curves generated from fitting  
300 the model of [2] to that data and compute 95% confidence intervals on the probability of elimination.

301 Fig. 4 presents our main results with time relative to the last observed case in each bootstrap ( $\Delta s$ ) and blue and  
302 red curves as the outputs of [2] and our method. While the median 95% relative declaration times (black circles) are  
303 close, the approach of [2] yields a delayed declaration. This effect is reduced if we use the lower bound of the  $z_s$   
304 curves instead of their median. When  $z_s$  is small (which is not practical for defining end-of-epidemic declarations)  
305 we find that the methods are less consistent. The WHO declaration time (dark blue) for this epidemic is over one  
306 week later than the time proposed by both methods [2]. While our method shows wider uncertainty, the similarity  
307 of these intervals suggests that our formulation is robust to moderate model mismatch.

### 308 *Under-reporting leads to premature declarations*

309 Having verified  $z_s$  and hence  $t_\mu$  as reliable and sensible means of assessing the conclusion of an epidemic,  
310 we investigate the effect of model mismatch due to imperfect surveillance. We start with case under-reporting,  
311 which affects all infectious disease outbreaks to some degree. While previous works have drawn attention to how  
312 constant under-reporting can bias end-of-epidemic declarations [6] [7], no analytic results are available. Moreover,  
313 the impact of time-varying under-reporting, which models a wide range of more realistic surveillance scenarios  
314 [8, 34], remains unstudied. We provide mathematical background for our under-reporting models in Methods.

315 Fig. 1 illustrates how under-reporting results in only a portion,  $N_s$ , of the total local cases,  $I_s$  being sampled  
316 or observed. We use  $U_s = I_s - N_s \geq 0$  to denote the unreported cases. We investigate two hypotheses or models  
317 about the incidence curve, a null one,  $\mathcal{H}_0$ , where we assume that the observed cases  $N_1^s$  represent all the infected  
318 individuals and an alternative hypothesis  $\mathcal{H}_1$ , in which the unreported cases  $U_1^s$  (and hence  $I_1^s$ ) are known and

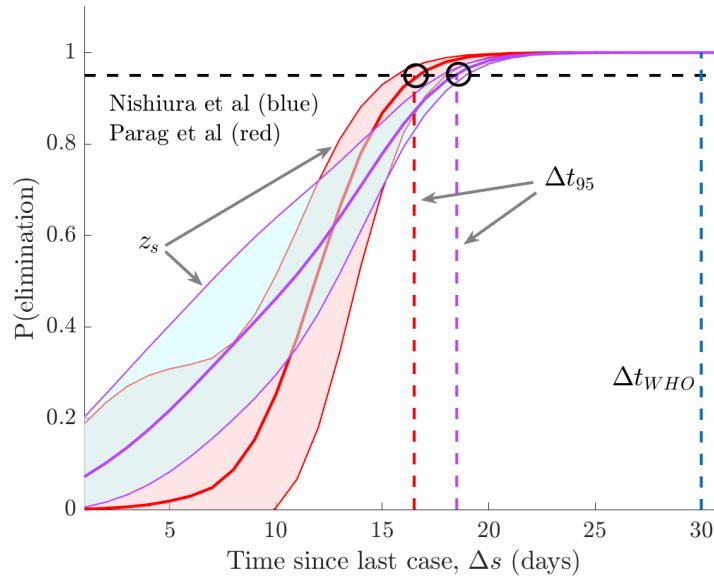

Fig. 4: **Empirical method comparison.** We compare 95% confidence intervals on the elimination probability from [2] (blue) and  $z_s$  from Eq. (9) (red) on bootstrapped epidemics based on the MERS-CoV data from South Korea used in [2]. Black circles define the median relative declaration time ( $\Delta t_{95}$ ) when each method deems the epidemic to be over with 95% confidence (the event trigger). Time is relative to the last observed case in each epidemic bootstrap and the WHO (time-triggered) declaration time ( $\Delta t_{WHO}$ ) is in dark blue.

319 distinguished. The estimated elimination probabilities under both surveillance models are:

$$\begin{aligned}
 \mathcal{H}_0 : z_s | N_1^s &= \mathbb{P} \left( \bigwedge_{j=s}^{\infty} N_{j+1} = 0 | N_1^s \right) \text{ and} \\
 \mathcal{H}_1 : z_s | I_1^s &= \mathbb{P} \left( \bigwedge_{j=s}^{\infty} I_{j+1} = 0 | N_1^s \wedge U_1^s \right).
 \end{aligned}
 \tag{12}$$

321 Here  $\mathcal{H}_0$  portrays a naive interpretation of the observed ( $N_s$ ) incidence, while  $\mathcal{H}_1$  indicates ideal surveillance.  
 322 Intensive and targeted population testing should interpolate between  $\mathcal{H}_0$  and  $\mathcal{H}_1$ . We compute  $z_s | N_1^s$  by constructing  
 323 the sampled total infectiousness  $\tilde{\Lambda}_s := \sum_{u=1}^{s-1} w_u N_{s-u}$  and then applying Theorem 1. This follows because  $N_s$  can  
 324 also be described by a Poisson renewal model (see Methods for details). We therefore find that  $z_s | N_1^s = \prod_{j=s}^{\infty} (1 +$   
 325  $\tilde{\Lambda}_{j+1} \tilde{\beta}_{\tau(j)})^{-a-n_{\tau(j)}}$  with  $n_{\tau(j)}$  and  $\tilde{\lambda}_{\tau(j)}$  as the sums of  $N_u$  and  $\tilde{\Lambda}_u$  within the  $\tau(j)$  window and  $\tilde{\beta}_{\tau(j)} = 1/c + \tilde{\lambda}_{\tau(j)}$ .  
 326 We get  $z_s | I_1^s$  directly from Eq. (8) since this is the perfect surveillance case.

327 Since  $N_s \leq I_s$  for all  $s$  then  $\lambda_{\tau(j)} \geq \tilde{\lambda}_{\tau(j)}$  for all  $j$ , assuming that the same serial interval distribution applies.  
 328 As a result,  $\beta_{\tau(j)} \leq \tilde{\beta}_{\tau(j)}$ , which means that  $z_s | N_1^s \geq \prod_{j=s}^{\infty} (1 + \tilde{\Lambda}_{j+1} \beta_{\tau(j)})^{-a-n_{\tau(j)}} := \phi$ . From Eq. (8) we can  
 329 rewrite  $z_s | I_1^s = \prod_{j=s}^{\infty} (1 + \Lambda_{j+1} \beta_{\tau(j)})^{-a-n_{\tau(j)}-u_{\tau(j)}}$  with  $u_{\tau(j)} = i_{\tau(j)} - n_{\tau(j)}$  as the total number of unreported  
 330 cases in the window  $\tau(j)$ . We examine the ratio of  $z_s | N_1^s$  to  $z_s | I_1^s$ , which is at least as large as  $\phi / (z_s | I_1^s)$ . If  
 331 this ratio is above 1 then the elimination probability is being inflated by imperfect surveillance. We find that  
 332  $\phi / (z_s | I_1^s) = \prod_{j=s}^{\infty} (1 + \Lambda_{j+1} \beta_{\tau(j)})^{u_{\tau(j)}} \left( \frac{1 + \Lambda_{j+1} \beta_{\tau(j)}}{1 + \tilde{\Lambda}_{j+1} \beta_{\tau(j)}} \right)^{a+n_{\tau(j)}}$ . Since  $\Lambda_j \geq \tilde{\Lambda}_j$  at every  $j$  (historical numbers of cases

333 are fewer) and the remaining term is always  $\geq 1$  we do find this inflation and consequently

$$334 \quad z_s | N_1^s \geq z_s | I_1^s \implies t_\mu | \mathcal{H}_0 \leq t_\mu | \mathcal{H}_1. \quad (13)$$

335

336 At no point have we assumed any form for the under-reporting fraction, denoted  $\rho_s$  at time  $s$  (see Methods). Our  
337 derivation only depends on under-reporting causing smaller (absolute) historical incidence.

338 Thus any under-reporting, whether constant (i.e. all  $\rho_s$  are the same) or time-varying will engender premature  
339 or false-positive end-of-epidemic declarations provided  $N_s$  is randomly sampled from  $I_s$  (so Theorem 1 holds; see  
340 Eq. (3)). We highlight this principle by examining a random sampling scheme using empirical SARS 2003 data  
341 from Hong Kong [12]. We binomially sample the SARS incidence with random probability  $\rho_s \sim \text{Beta}(a, b)$ . We  
342 set  $b = 40$  and compute  $a$  so that the mean sampling fraction  $\mathbb{E}[\rho_s] = f_\rho$  takes some desired (fixed) value. We  
343 investigate various  $f_\rho$  and show that premature declarations are guaranteed in (a) and (b) of Fig. 5. The impact of  
344  $\rho_s$  is especially large when under-reporting leads to early but false sequences of 0 cases, which is additional to the  
345 bias from Eq. (13). We present results in absolute time to showcase this effect.

#### 346 *Importation results in late declarations*

347 The influence of imported cases on end-of-epidemic declarations, to our knowledge, has not been investigated  
348 in the literature. Repeated importations or migrations of infected cases are a common means of seeding and re-  
349 seeding local infectious epidemics. Failing to ascertain which cases are local or imported can significantly change  
350 our perception of transmission [9]. We assume that  $I_s$  is the total count of local cases in our region of interest but  
351 that at time  $s$  there are also  $M_s$  imported cases that have migrated from neighbouring regions. The total number  
352 of infected cases observed is  $C_s = I_s + M_s$  as displayed in Fig. 1. We provide mathematical background on  
353 how importations are included within the renewal framework in Methods. We consider two hypotheses about our  
354 observed incidence data that reflect real epidemic scenarios.

355 Under the null hypothesis,  $\mathcal{H}_0$ , we assume that all cases are local and so we cannot disaggregate the components  
356 of  $C_s$ . The alternative,  $\mathcal{H}_1$ , assumes perfect surveillance. Imported cases are distinguished from local ones under  
357  $\mathcal{H}_1$  and their differing impact considered. The relevant elimination probabilities for each model are

$$358 \quad \mathcal{H}_0 : z_s | C_1^s = \mathbb{P}(\bigwedge_{j=s}^{\infty} C_{j+1} = 0 | C_1^s) \quad \text{and} \quad (14)$$

$$359 \quad \mathcal{H}_1 : z_s | I_1^s = \mathbb{P}(\bigwedge_{j=s}^{\infty} I_{j+1} = 0 | I_1^s \wedge M_1^s).$$

359 Since  $\mathcal{H}_0$  deems all cases local, it models  $C_s$  as a renewal process with total infectiousness  $\bar{\Lambda}_s := \sum_{u=1}^{s-1} C_{s-u} w_s$ .  
360 Thus we use Theorem 1 to obtain the  $j^{\text{th}}$  factor of  $z_s | C_1^s$  as  $q_j | C_1^s = (1 + \bar{\Lambda}_{j+1} \bar{\beta}_{\tau(j)})^{-a - c_{\tau(j)}}$  with  $\bar{\beta}_{\tau(j)} = 1/c + \bar{\lambda}_{\tau(j)}$ .  
361 Here  $c_{\tau(j)}$  and  $\bar{\lambda}_{\tau(j)}$  are sums of  $C_u$  and  $\bar{\Lambda}_u$  over window  $\tau(j)$ .



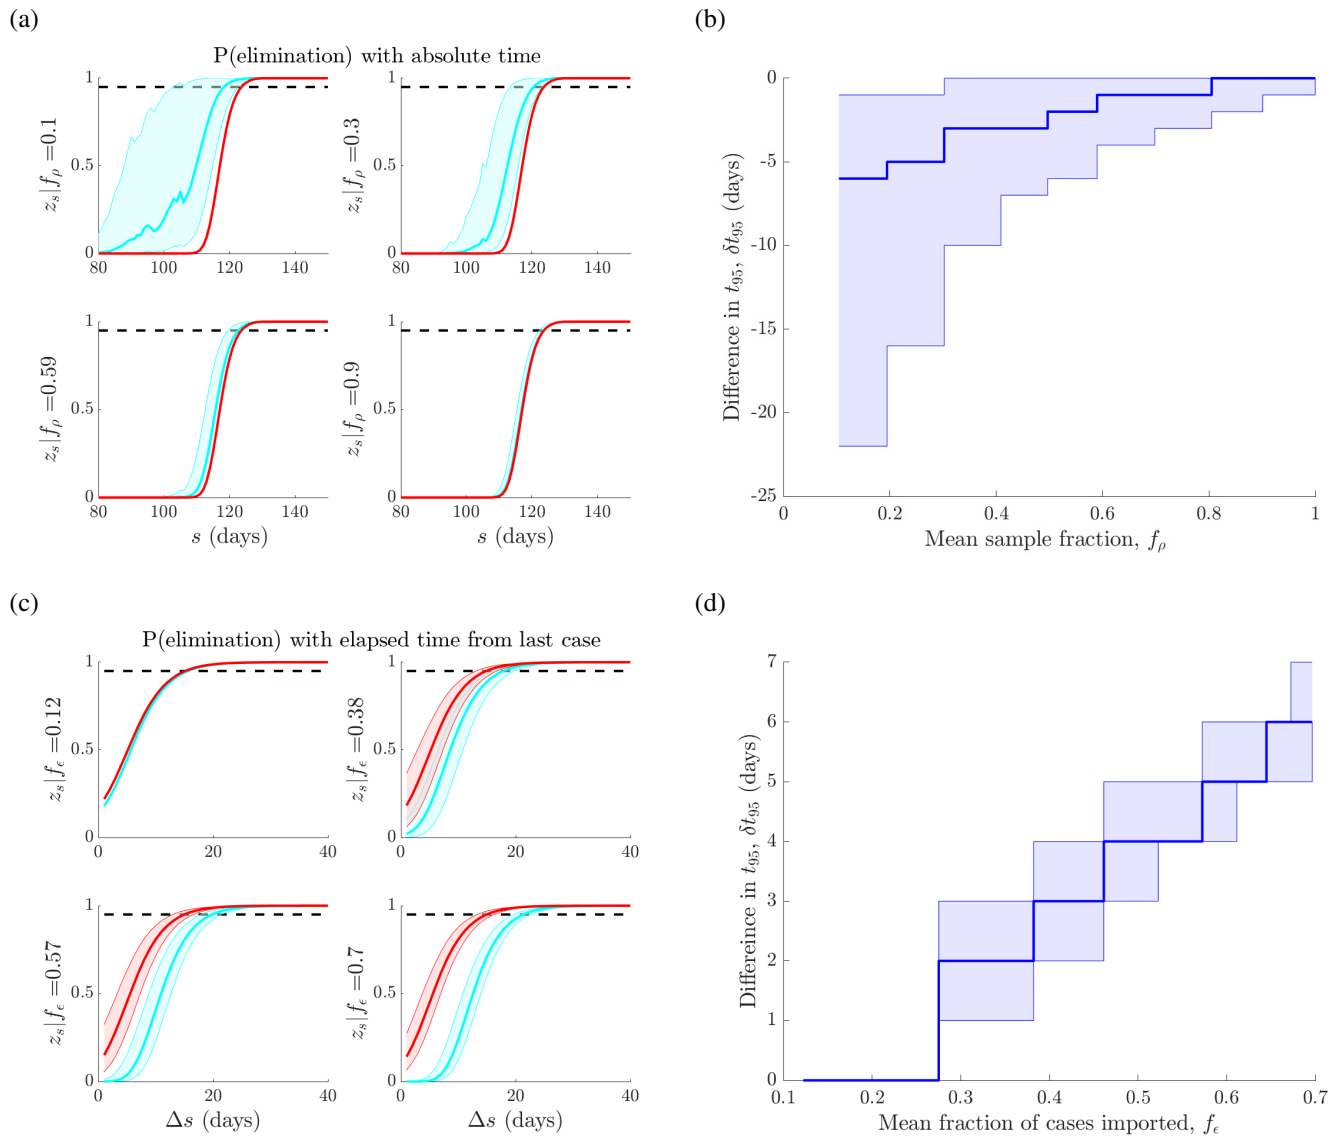

**Fig. 5: Case under-reporting and importation lead to premature and delayed declarations respectively.** In (a) and (b) we binomially sample an empirical SARS 2003 incidence curve from Hong Kong with reporting probabilities drawn from a beta distribution with mean  $f_\rho$ . In (a) we plot the elimination probability  $z_s$  when surveillance is ideal i.e. there is no underreporting (red) versus when the under-reporting is unknown (blue). The difference in the 95% declaration times, denoted  $\delta t_{95}$ , from these curves is in (b). As  $f_\rho$  increases we are more likely to declare too early. In (c) and (d) we consider an empirical MERS-CoV 2014-5 incidence curve from Saudi Arabia with local and imported cases. We increase the mean fraction of imported cases to  $f_\epsilon$  by adding Poisson imports with mean  $\epsilon$  and in (c) compute  $z_s$  with (red) and without (blue) accounting for the difference between imports and local cases. The change in  $t_{95}$  is given in (d). As  $\epsilon$  and hence  $f_\epsilon$  increase later declarations become more likely. We repeat our sampling or importation procedure 1000 times to obtain confidence intervals in (a)–(d). As  $f_\epsilon \rightarrow 0$  or  $f_\rho \rightarrow 1$  we attain the ideal surveillance scenarios of no unreported or imported cases.

362 Under  $\mathcal{H}_1$  the imported cases are distinguished but all cases still contribute to ongoing local transmission [9, 28].  
363 Consequently,  $I_s$  still adheres to a renewal transmission process and Theorem 1 yields the  $j^{\text{th}}$  factor of  $z_s | I_1^s$  as  
364  $q_j | I_1^s = (1 + \bar{\Lambda}_{j+1} \bar{\beta}_{\tau(j)})^{-a - i_{\tau(j)}}$ . We compare  $q_j | I_1^s$  with  $q_j | C_1^s$  directly to easily prove that

365 
$$z_s | C_1^s \leq z_s | I_1^s \implies t_{\mu} | \mathcal{H}_0 \geq t_{\mu} | \mathcal{H}_1. \quad (15)$$
  
366

367 Not accounting for migrations shrinks the elimination probability leading to false-negative or unnecessarily late  
368 declarations. This result makes no assumption on the dynamics for importation other than it possesses Poisson  
369 noise (so Theorem 1 is valid for  $C_s$ ) and so holds quite generally (see Methods for further details).

370 We illustrate this phenomenon using empirical MERS-CoV data from Saudi Arabia [25] in (c) and (d) of Fig. 5.  
371 Here repeated importations occur as zoonotic camel to human transmissions. We show the increasing effect of  
372 importation by adding further (artificial) imports via a Poisson noise variable with mean  $\epsilon$  (see Eq. (4)). The mean  
373 fraction of imported to total cases across the incidence curve is then  $f_{\epsilon}$ . In Fig. 5 we see that larger  $\epsilon$  promotes  
374 increasingly later declaration times. In Fig. 5 we do not add any imports beyond the time of the last local case.  
375 If imports do come after this case, and seed no further local infections, which is likely for epidemics with large  
376 heterogeneity, then the  $t_0$  assumed under  $\mathcal{H}_0$  will be later, and further exacerbate the bias from importation.

## 377 DISCUSSION

378 Understanding and predicting the temporal dynamics of infectious disease transmission in real time is crucial  
379 to controlling existing epidemics and to thwarting future resurgences of those outbreaks, once controlled [21]. To  
380 achieve this understanding it is necessary to characterise and study the infectious disease throughout its lifetime.  
381 While many works have focussed on the growth, peak and controlled phases of epidemics (see Fig. 2), relatively  
382 less research has examined how the tail of the outbreak shapes the kinetics of its elimination. For example, while  
383 much is known about how the basic and effective reproduction numbers influence the growth rate, peak size and  
384 controllability of an epidemic [4, 35], the relationship between these numbers and the waiting time to epidemic  
385 elimination or extinction is still largely unexplored.

386 However, this relationship has important implications for public health policy. Knowing when to relax non-  
387 pharmaceutical interventions, such as social distancing or lockdowns, can be essential to effectively managing and  
388 mitigating the financial and social disruption caused by an outbreak as well as to safeguarding populations from the  
389 risk of future waves of the disease [1, 2]. The ongoing COVID-19 pandemic for instance, which in some countries  
390 such as New Zealand entered a prolonged period of near-elimination before resurgence occurred [33], provides a  
391 current and important example where this question might soon become urgent.

392 Existing WHO guidance on deciding when an outbreak can be safely declared over takes a time-triggered  
393 approach. This means a fixed waiting time from the last observed case, usually based on the incubation period

394 of the disease, is adopted [3]. While this approach is easy to follow, it does not change informatively between  
395 outbreaks of the same disease, even if the patterns of transmission are very different and cannot provide a measure  
396 of the reliability of this suggested declaration time. The few existing studies that have investigated this waiting-time  
397 problem [2, 6, 7] have all converged to what is known as an event-triggered solution in control theory [13].

398 Event-triggered decision-making has been shown to be more effective than acting at deterministic or fixed times  
399 for a range of problems including several involving the optimising of waiting or stopping times [14, 15, 16, 17].  
400 Moreover, because it directly couples decision making to observables of interest (in our case the incidence curve),  
401 it can better adapt or respond to changes in dynamics. Here we have attempted to build upon these realisations  
402 to better characterise the relationship between epidemic transmission and elimination. Specifically, we focussed on  
403 computing the probability at time  $s$ ,  $z_s$ , that the total future incidence of the epidemic is zero.

404 This probability is directly responsible for determining how quickly an epidemic will end. In fact, if an outbreak  
405 is defined as surviving if it can propagate at least 1 future infection then  $1 - z_s$  is precisely its survival function and is  
406 therefore rigorously linked to the future risk of cases. By taking a renewal process approach, we were able to derive  
407 an analytic and real-time measure of  $z_s$  that explicitly depends on up-to-date estimates of the effective reproduction  
408 number (see Eq. (9)). This result formed the main theorem of this paper and provided a clear and easily-computed  
409 link between epidemic transmission and elimination. To our knowledge, no previous work has directly obtained  
410  $z_s$ . Specifically, [2] computed a simpler and more conservative quantity while [6] and [7] approximated something  
411 similar via simulation, and so cannot provide real-time formulae. The event-trigger for declaring an outbreak over  
412 with  $\mu\%$  confidence is then the first time that  $z_s$  crosses a threshold of  $\frac{\mu}{100}$ .

413 To validate the correctness of our approach we considered several comparisons. We proved mathematically that  
414 our formulae recover the true elimination probability and event trigger given perfect knowledge of the epidemic. This  
415 provided theoretical justification for our approach (Eq. (11)). We verified practical performance by benchmarking  
416 our method against the known (true) declaration times from simulated outbreaks of several infectious diseases  
417 (Fig. 3) and on empirical data by directly comparing to [2] (Fig. 4). We found that our method generated sensible  
418 and reasonably accurate estimates, given the fundamental difficulties of inferring  $R_s$  at low incidence. Integrating  
419 our method with newly developing approaches that improve on  $R_s$  estimates in these low data conditions [33],  
420 should further enhance performance and forms part of our future work.

421 Fig. 3, Fig. 4 and S1 Fig also explained why time-triggered methods, such as the existing WHO guidelines, can be  
422 unreliable or deceptive. Replicate epidemics driven by the same time-series of reproduction numbers can engender  
423 significantly different relative declaration times  $\Delta t_{95}$ . This variability exists even if  $R_s$  is known perfectly (i.e. when  
424 we have  $\Delta t_{95}^*$ ). As no single, fixed time can reasonably approximate this distribution, time-triggered approaches are  
425 necessarily performance limited. Moreover, we can never guarantee the confidence in such a declaration because

426  $z_s$  and  $z_s^*$  also vary considerably for epidemics of the same disease even under identical transmission dynamics.  
427 These issues will only worsen with the additional noise deriving from non-ideal surveillance.

428 Exploring non-ideal surveillance noise and rigorously assessing its impact on the tail dynamics of epidemics  
429 was the main motivation for developing our method. Consequently, we investigated two prevalent and potentially  
430 dominant sources of noise in surveillance – unreported and imported cases [9, 26]. While both [6] and [7] looked  
431 at the effect of constant under-reporting on declarations, general insight into the more realistic time-varying case is  
432 lacking. Further, the influence of importation on the epidemic tail has, to our knowledge, not yet been examined.  
433 By adapting  $z_s$  to various surveillance hypotheses we proved two key results and developed a flexible framework  
434 for incorporating and analysing the influence of other related noise sources.

435 First, we showed that any type of random under-reporting will precipitate early declarations, which worsen as  
436 the fraction of unreported cases increases (Eq. (13)). Second, we found that any random importation process will  
437 lead to late declarations that become more delayed as the fraction of imports increase (Eq. (15)). Moreover, under-  
438 reporting and importation processes can respectively, cause falsely early and late starts (i.e.  $t_0$  in our notation) to  
439 the sequence of zero incidence days that are used to determine declaration times, thus exacerbating the bias from  
440 each noise source. We illustrated the biases of both unreported and imported cases using empirical data (Fig. 5),  
441 clarifying how the epidemic tail is sensitive to these imperfections in the collection or reporting of incidence data.

442 The theoretical framework we employed to reveal these biases can also help generate insight into other noise  
443 sources and surveillance hypotheses. It provides a scheme for investigating case misidentification, asymptomatic  
444 transmission and reporting delays, among others. The first occurs when cases of a co-circulating diseases are  
445 misattributed to the disease of interest due to overlapping symptoms and is common among influenza-like illnesses  
446 [8]. The disease of interest is then effectively over-reported, which may be modelled as a false importation process  
447 with  $M_s$  as the over-reported cases in Eq. (4), but past  $M_s$  counts do not contribute to  $I_s$  (and so are not in its  
448 total infectiousness term). It then follows that declaration times will be delayed.

449 Asymptomatic transmission and reporting delays are effectively types of under-reporting. In the first, the cases  
450 observed at any time represent only the symptomatic fraction of actual infections. Consequently, a formulation  
451 similar to Eq. (3) applies, with variations depending on whether the asymptomatic proportion has the same or a  
452 different serial interval distribution [36]. The result is that end-of-epidemic declarations that do not account for  
453 asymptomatic transmission will be early. Reporting delays act as time-varying under-reporting fractions, which  
454 especially degrade the more recent case days [10]. While the model required is more involved than Eq. (3), since  
455 the declaration times largely depend on cumulative case counts, they are also likely to be premature.

456 While our method presents a clean framework for estimating the lifetime of an epidemic and investigating  
457 surveillance noise sources, it has several limitations. It commonly assumes that the serial interval distribution is

458 known [12]. However, if surveillance is poor and changes to the serial interval (e.g. contractions due to interventions  
459 [30]) are not measured or included in computing  $z_s$  then declaration times might be biased. Moreover, we neglect  
460 transmission heterogeneity, are necessarily hindered by the difficulty of estimating reproduction numbers at low  
461 incidence and do not consider interactions among noise sources. While these factors could limit the accuracy of our  
462 predicted declaration times, many can be accommodated as future extensions. We can incorporate heterogeneity  
463 by using negative binomial renewal models [1], improve on low incidence estimates by capitalising on specialised  
464 methods [33] and extend the models in Fig. 1 to examine mixed noise types.

465 A key contribution of this work has been clarifying and highlighting how realistic imperfections in the collection  
466 or reporting of incidence data can significantly influence and bias the tail dynamics of an epidemic. Heightened  
467 surveillance should therefore be sustained even in periods of negligible incidence. Intensive testing and tracing  
468 is especially essential as it provides a means of measuring and compensating for case under-reporting, which we  
469 found to be among the strongest sources of bias. Maintaining good quality screening and geodata is also important  
470 since having accurate case origins can prevent misidentification, which is a main cause of unknown or unrecognised  
471 imports. These sentiments echo many issues currently being faced across the COVID-19 pandemic [19, 37].

472 Real-time assessments of epidemic dynamics are crucial for understanding and aptly responding to unfolding  
473 epidemics [21]. We hope that the analytic approach developed here will serve as a useful tool for gaining ongoing  
474 insight into the tail dynamics of an outbreak, motivate the adoption of more event-triggered decision making and  
475 provide clear impetus for improving and sustaining surveillance across all phases of an epidemic. Our method  
476 is available at <https://github.com/kpzoo/End-of-epidemic-declarations>. Our future work aims to develop this tool  
477 from its current form as a passive means of understanding and uncovering biases to an approach that can actively  
478 infuse additional data streams (e.g. case ascertainment ratios) to compensate for these biases in end-of-epidemic  
479 declarations.

#### 480 ACKNOWLEDGMENTS

481 KVP and CAD acknowledge joint centre funding from the UK Medical Research Council and Department for  
482 International Development under grant reference MR/R015600/1. RNT thanks Christ Church (Oxford) for funding  
483 via a Junior Research Fellowship. CAD thanks the UK National Institute for Health Research Health Protection  
484 Research Unit (NIHR HPRU) in Modelling Methodology at Imperial College London in partnership with Public  
485 Health England (PHE) for funding (grant HPRU-2012–10080). The funders had no role in study design, data  
486 collection and analysis, decision to publish, or preparation of the manuscript.

487

## AUTHOR CONTRIBUTIONS

488 Conceptualization: KVP and RNT. Formal analysis, investigation, methodology, project administration, software,  
489 visualisation and writing (original draft preparation): KVP. Validation: KVP, RJ, RNT and CAD. Writing (review  
490 and editing): KVP, RNT, RJ and CAD.

491

## REFERENCES

- 492 1. Lee H, Nishiura H. Sexual transmission and the probability of an end of the Ebola virus disease epidemic. *J Theor Biol.* 2019;471:1–12.
- 493 2. Nishiura H, Miyamatsu Y, Mizumoto K. Objective determination of end of MERS outbreak, South Korea. *Emerg Infect Dis.* 2016;22:146–8.
- 494 3. WHO. WHO recommended criteria for declaring the end of the Ebola virus disease outbreak; 2020. Available from: [https://www.who.int/who-documents-detail/](https://www.who.int/who-documents-detail/who-recommended-criteria-for-declaring-the-end-of-the-ebola-virus-disease-outbreak)  
495 [who-recommended-criteria-for-declaring-the-end-of-the-ebola-virus-disease-outbreak](https://www.who.int/who-documents-detail/who-recommended-criteria-for-declaring-the-end-of-the-ebola-virus-disease-outbreak).
- 496 4. Wallinga J, Lipsitch M. How generation intervals shape the relationship between growth rates and reproductive numbers. *Proc R Soc B.* 2007;274:599–604.
- 497 5. Fraser C. Estimating Individual and Household Reproduction Numbers in an Emerging Epidemic. *PLOS One.* 2007;8:e758.
- 498 6. Thompson R, Morgan O, Jalave K. Rigorous surveillance is necessary for high confidence in end-of-outbreak declarations for Ebola and other infectious diseases. *Phil Trans R*  
499 *Soc B.* 2019;374:20180431.
- 500 7. Djaafara B, Imai N, Hamblion E, et al. A quantitative framework to define the end of an outbreak: application to Ebola Virus Disease. *medRxiv.* 2020;(20024042).
- 501 8. White L, Pagano M. Reporting errors in infectious disease outbreaks, with an application to Pandemic Influenza A/H1N1. *Epidemiol Perspec Innov.* 2010;7(12).
- 502 9. Churcher T, Cohen J, Ntshalintshali N, et al. Measuring the path toward malaria elimination. *Science.* 2014;344(6189):1230–32.
- 503 10. Yan P, Chowell G. Quantitative Methods for Investigating Infectious Disease Outbreaks. vol. 70 of Texts in Applied Mathematics. Cham, Switzerland: Springer; 2019.
- 504 11. Fraser C, Cummings D, Klinkenberg D, et al. Influenza Transmission in Households During the 1918 Pandemic. *Am J Epidemiol.* 2011;174(5):505–14.
- 505 12. Cori A, Ferguson N, Fraser C, et al. A New Framework and Software to Estimate Time-Varying Reproduction Numbers During Epidemics. *Am J Epidemiol.* 2013;178(9):1505–12.
- 506 13. Astrom K, Bernhardsson B. Comparison of periodic and event based sampling for first order systems. *Proc IFAC World Conf.* 1999:301–6.
- 507 14. Parag K. On signalling and estimation limits for molecular birth-processes. *J Theor Biol.* 2019;480:262–73.
- 508 15. Rabi M, Moustakides G, Baras J. Adaptive Sampling for Linear State Estimation. *SIAM Journal of Control and Optimization.* 2012;50(2):672–702.
- 509 16. Parag K, Vinnicombe G. Point Process Analysis of Noise in Early Invertebrate Vision. *PLOS Comput Biol.* 2017;13(10):e1005687.
- 510 17. Lemmon M. Event-Triggered Feedback in Control, Estimation, and Optimization. vol. 406 of Networked Control Systems. London: Springer; 2010. p. 293–358.
- 511 18. Bhatia S, Cori A, Parag K, et al. Short-term forecasts of COVID-19 deaths in multiple countries.; 2020. Available from: <https://mrc-ide.github.io/covid19-short-term-forecasts>.
- 512 19. Pybus O, Rambaut A, du Plessis L, Zarebski A, et al. Preliminary analysis of SARS-CoV-2 importation & establishment of UK transmission lineages; 2020. Available from:  
513 <https://virological.org/t/preliminary-analysis-of-sars-cov-2-importation-establishment-of-uk-transmission-lineages> [cited 13 June 2020].
- 514 20. Thompson R, Hollingsworth D, Isham V, et al. Key questions for modelling COVID-19 exit strategies. *Proc R Soc B.* 2020;287(1932):20201405.
- 515 21. Cauchemez S, Boelle P, Thomas G, et al. Estimating in Real Time the Efficacy of Measures to Control Emerging Communicable Diseases. *Am J Epidemiol.* 2006;164(6):591–7.
- 516 22. Parag K, Donnelly C. Using information theory to optimise epidemic models for real-time prediction and estimation. *PLOS Comput Biol.* 2020;16(7):e1007990.
- 517 23. De Serres G, Gay N, Farrington P. Epidemiology of Transmissible Diseases after Elimination. *Am J Epidemiol.* 2000;151(11).
- 518 24. Parag K, Donnelly C. Adaptive Estimation for Epidemic Renewal and Phylogenetic Skyline Models. *Syst Biol.* 2020;(syaa035).
- 519 25. Thompson R, Stockwin J, van Gaalen R, et al. Improved inference of time-varying reproduction numbers during infectious disease outbreaks. *Epidemics.* 2019;29:100356.
- 520 26. Azmon A, Faes C, Hens N. On the estimation of the reproduction number based on misreported epidemic data. *Stats Med.* 2014;33:1176–92.
- 521 27. Raikov D. On the decomposition of Poisson laws. *Dokl Acad Sci URSS.* 1937;14:9–11.
- 522 28. Roberts M, Nishiura H. Early Estimation of the Reproduction Number in the Presence of Imported Cases: Pandemic Influenza H1N1- 2009 in New Zealand. *PLOS One.*  
523 2011;6(5):e17835.
- 524 29. Van Kerkhove M, Bento A, Mills H, et al. A review of epidemiological parameters from Ebola outbreaks to inform early public health decision-making. *Sci Data.* 2015;2:150019.
- 525 30. Ali S, Wang L, Lau E, et al. Serial interval of SARS-CoV-2 was shortened over time by nonpharmaceutical interventions. *Science.* 2020;369(6507):1106–9.
- 526 31. White L, Pagano M. A likelihood-based method for real-time estimation of the serial interval and reproductive number of an epidemic. *Stats Med.* 2008;27:2999–3016.
- 527 32. Ferguson N, Laydon D, Nedjati-Gilani G, et al. Impact of non-pharmaceutical interventions (NPIs) to reduce COVID- 19 mortality and healthcare demand. Imperial College  
528 London; 2020.
- 529 33. Parag K. Improved estimation of time-varying reproduction numbers at low case incidence and between epidemic waves. *medRxiv.* 2020;2020.09.14.20194589.
- 530 34. Parag K, du Plessis L, Pybus O. Jointly inferring the dynamics of population size and sampling intensity from molecular sequences. *Mol Biol Evol.* 2020;37(8):2414–29.

- 531 35. Brauer F, van den Driessche P, Wu J, editors. *Mathematical Epidemiology*. Lecture Notes in Mathematics. Berlin, Germany: Springer-Verlag; 2008.
- 532 36. Park S, Cornforth D, Dushoff J, et al. The time scale of asymptomatic transmission affects estimates of epidemic potential in the COVID-19 outbreak. *Epidemics*. 2020;31:100392.
- 533 37. Li R, Pei S, Chen B, et al. Substantial undocumented infection facilitates the rapid dissemination of novel coronavirus (SARS-CoV-2). *Science*. 2020;368(6490):489–93.

534

SUPPORTING INFORMATION

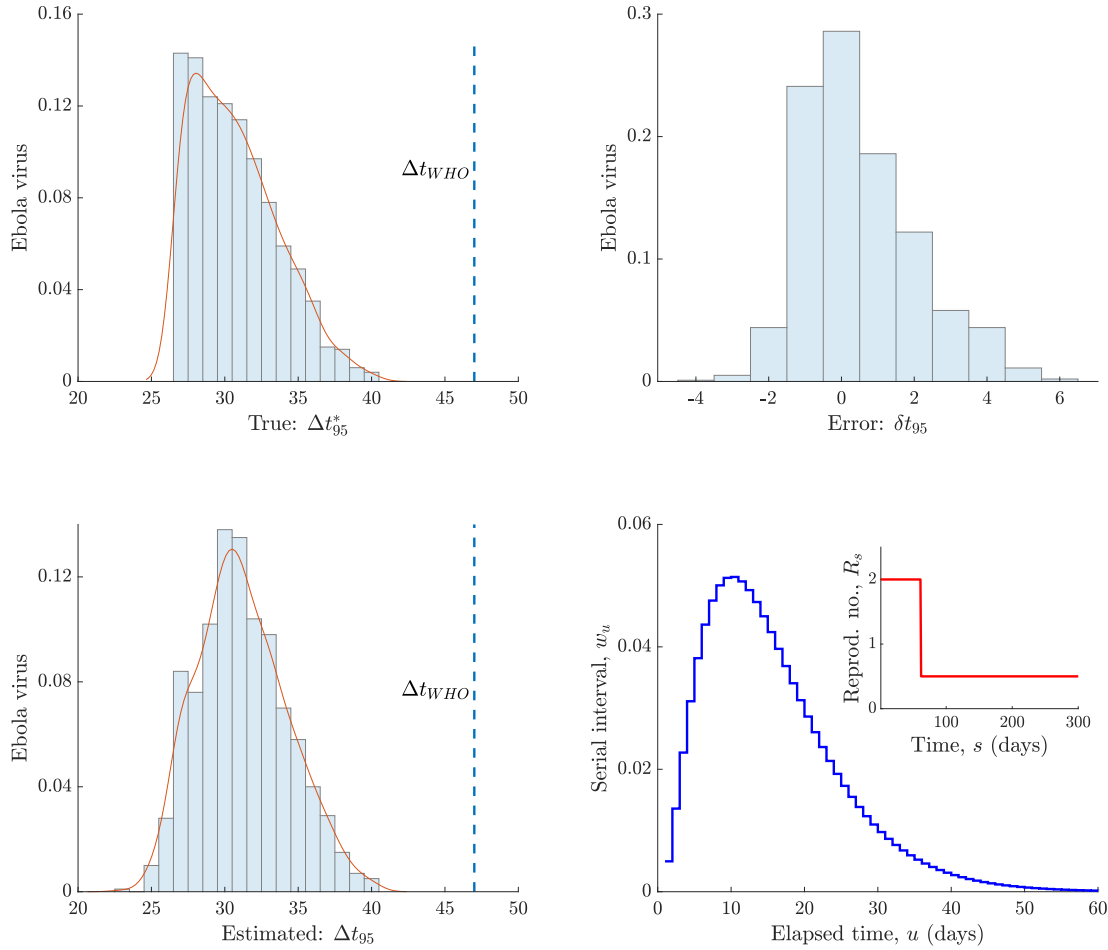

**Fig. S1: Event and time-triggered declarations.** We compare 95% event-triggered declaration times to the WHO time-triggered equivalent for Ebola virus disease over 1000 simulated epidemics. Left panels show the true ( $\Delta t_{95}^*$ ) and estimated ( $\Delta t_{95}$ ) declaration times (based on Eq. (10) and Eq. (9)) relative to the time of the last observed case. The significant variability in both, which reflects the different shapes of possible epidemic curves with the same reproduction number profile ( $R_s$ ) indicates why time-triggered approaches such as the WHO one [3] ( $\Delta t_{WHO}$ , which is based on 42 days plus the time to recovery) can be insufficient. The error between the true and estimated times ( $\delta t_{95}$ ) and the serial interval and reproduction number profile used are shown in the right panels.
